# Supplementary material for: The effects of molecular weight and orientation on the membrane permeation and partitioning of polycyclic aromatic hydrocarbons: a computational study
Source: Royal Society of Chemistry journal article supplement (doi:10.1039/d1cp04777a), 2021-12-14
Supplement: d1cp04777a1.pdf [file d1cp04777a1.pdf]

*Supporting Information for*

## **Effects of Molecular Weight and Orientation on the Membrane Permeation and Partitioning of Polycyclic Aromatic Hydrocarbons: A Computational Study**

Mi Zhou,<sup>†,‡</sup> Hong Yang,<sup>‡</sup> Huarong Li,<sup>‡</sup> Lingzhi Gu,<sup>‡</sup> Yang Zhou,<sup>‡,\*</sup> and Ming Li<sup>‡</sup>

<sup>†</sup> School of Materials Science & Engineering, Beijing Institute of Technology, Beijing 100081,

China;

<sup>‡</sup> Institute of Chemical Materials, China Academy of Engineering and Physics, Mianyang 621900,

China.

\*To whom correspondence should be addressed: E-mail: [zhouy@caep.cn](mailto:zhouy@caep.cn) (Y. Zhou);

**Table S1.** The cooperation between calculated parameters from 30-50 ns and the average value

| PAHs       | $P$ (cm·s <sup>-1</sup> ) |       |       |       |         | $\tau$ (ms) |       |       |       |         | $\log K_{LW}$ |       |       |       |         |
|------------|---------------------------|-------|-------|-------|---------|-------------|-------|-------|-------|---------|---------------|-------|-------|-------|---------|
|            | 35-40                     | 40-45 | 45-50 | 30-50 | average | 35-40       | 40-45 | 45-50 | 30-50 | average | 35-40         | 40-45 | 45-50 | 30-50 | average |
| <b>NAP</b> | 12.3                      | 12.8  | 11.6  | 11.7  | 12.1    | 0.11        | 0.1   | 0.14  | 0.19  | 0.14    | 2.57          | 2.53  | 2.68  | 2.81  | 2.65    |
| <b>PHE</b> | 26.2                      | 29.1  | 24.5  | 23.1  | 25.7    | 2.99        | 9.67  | 4.87  | 2.73  | 5.06    | 3.96          | 4.52  | 4.27  | 3.99  | 4.18    |
| <b>ANT</b> | 20.1                      | 16.6  | 16.4  | 16.9  | 17.5    | 1.16        | 2.71  | 5.41  | 6.51  | 3.95    | 3.81          | 4.08  | 4.32  | 4.39  | 4.15    |
| <b>PYR</b> | 20.9                      | 22.1  | 22.7  | 19.3  | 21.2    | 2.89        | 7.81  | 6.84  | 6.68  | 6.05    | 4.24          | 4.55  | 4.46  | 4.42  | 4.42    |
| <b>CHR</b> | 36.8                      | 39.1  | 38.8  | 41.2  | 39.0    | 359.0       | 605.9 | 707   | 469.9 | 535     | 6.49          | 6.73  | 6.73  | 6.58  | 6.63    |
| <b>BAP</b> | 42.5                      | 29.7  | 31.7  | 29.2  | 33.3    | 3339.3      | 613.5 | 475.7 | 294.8 | 1180    | 7.57          | 6.62  | 6.49  | 6.2   | 6.72    |
| <b>DBA</b> | 36.0                      | 35.4  | 30.4  | 26.4  | 32.1    | 123.2       | 289.3 | 269.9 | 303.4 | 246     | 5.81          | 6.11  | 6.10  | 6.05  | 6.02    |
| <b>COR</b> | 35.2                      | 33.1  | 35.4  | 32.7  | 34.1    | 16805       | 11878 | 2254  | 2858  | 8449    | 7.99          | 7.90  | 7.21  | 7.3   | 7.60    |

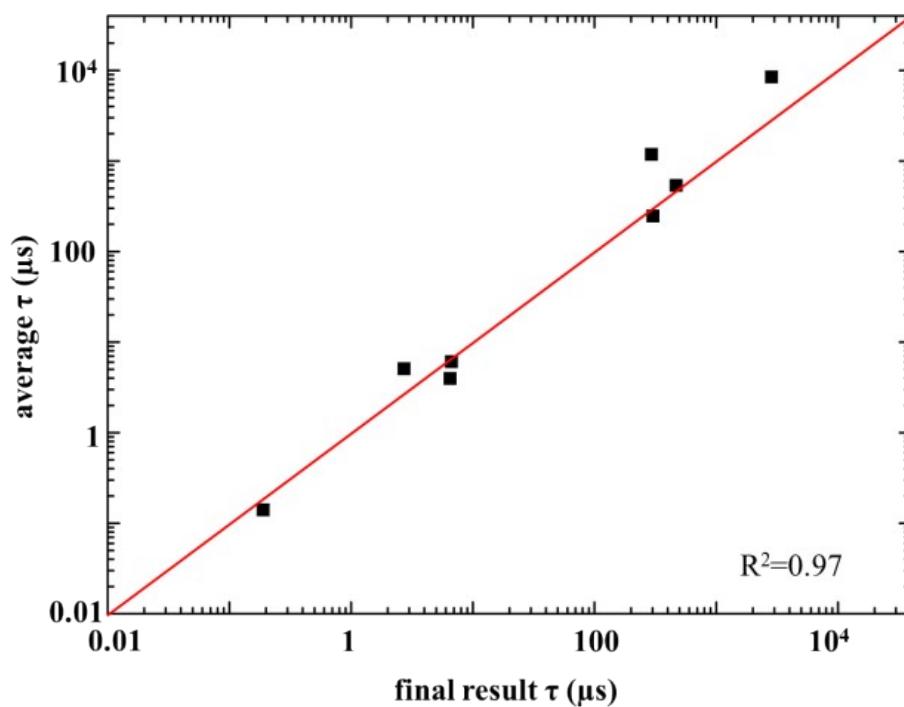

**Figure S1.** The fitting relationship between our final result of transmembrane time (30-50 ns) and average result (three simulation periods of 35-40 ns, 40-45 ns and 45-20 ns), the red line indicate a 1:1 agreement.

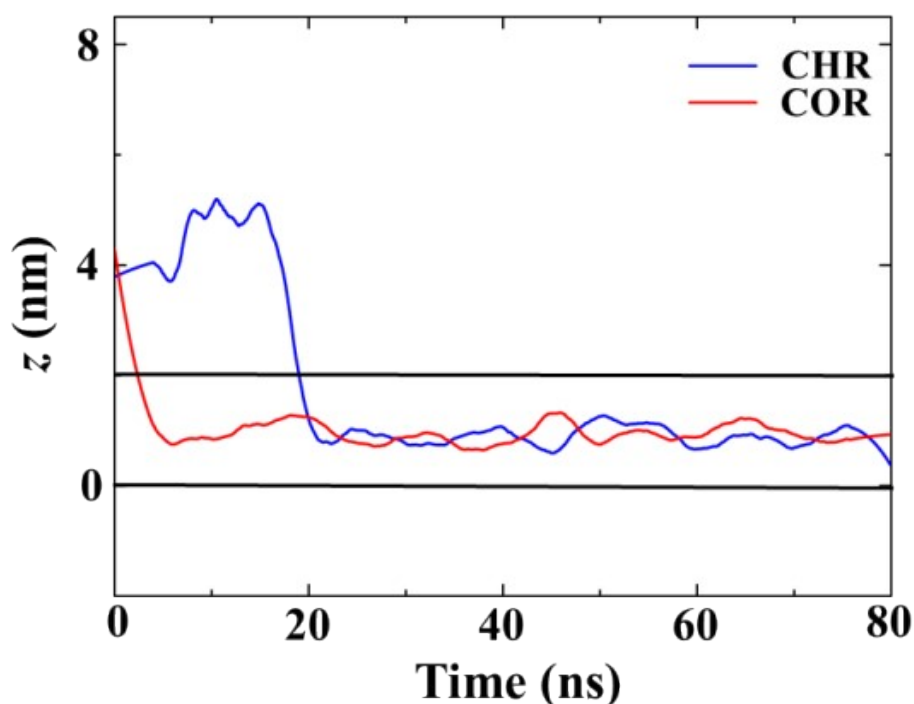

**Figure S2.** The time evolution of the  $z$  position of the center of mass of single CHR (blue line) and COR (red line). The horizontal lines at  $z = 0$  and  $z = 2$  nm represent the center and surface (which was substituted with the average position of the P) of lipid membrane, respectively.

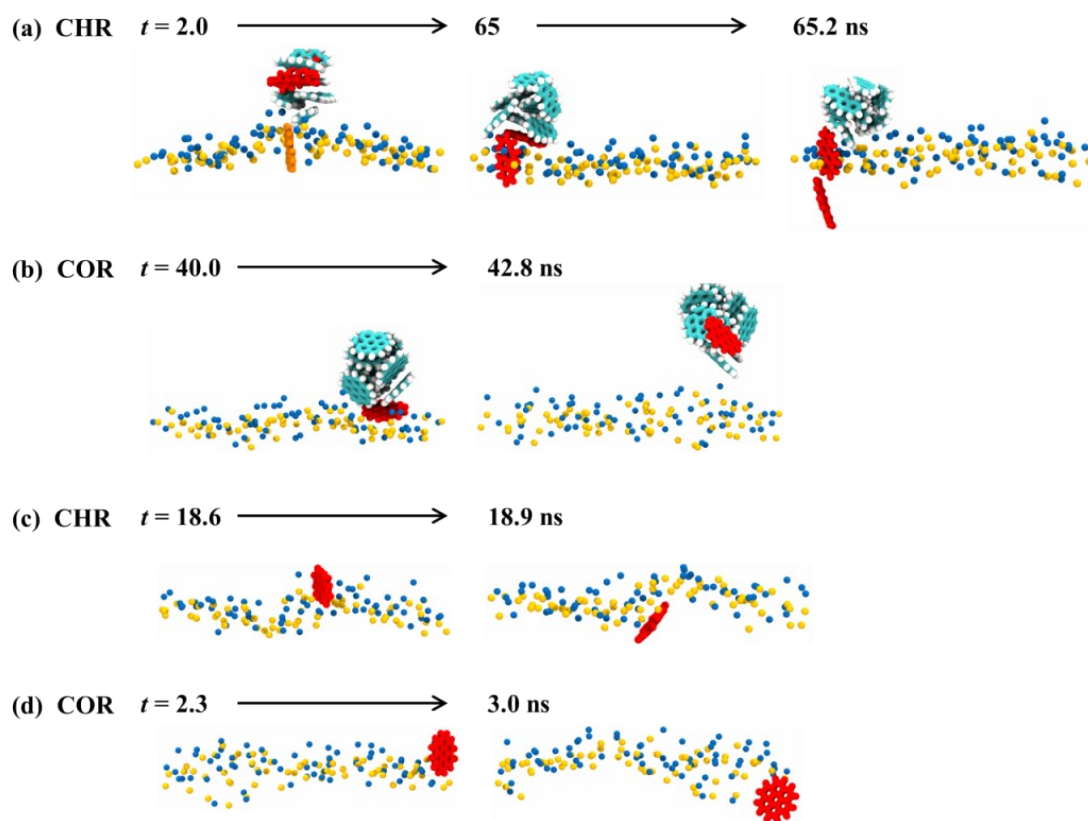

**Figure S3.** The typical snapshots of the absorption process of (a) CHR, (b) COR. (c) single CHR, (d) single COR.

**Table S2.** Summary of all simulations performed

|                         | solute | No. of solute | Duration (ns) |
|-------------------------|--------|---------------|---------------|
| <b>Constrained MD</b>   | NAP    | 1             | 50 × 32       |
|                         | PHE    | 1             | 50 × 32       |
|                         | ANT    | 1             | 50 × 32       |
|                         | PYR    | 1             | 50 × 32       |
|                         | CHR    | 1             | 50 × 32       |
|                         | BAP    | 1             | 50 × 32       |
|                         | DBA    | 1             | 50 × 32       |
|                         | COR    | 1             | 50 × 32       |
| <b>Unconstrained MD</b> | NAP    | 10            | 80            |

---

|     |    |    |
|-----|----|----|
| PYR | 10 | 80 |
| CHR | 10 | 80 |
| COR | 10 | 80 |
| CHR | 1  | 80 |
| COR | 1  | 80 |

---
